# Supplementary material
Source: PubMed Central journal article supplement (PMC3494256)
Supplement: supp_M030494_jlr.M030494-1.pdf [file supp_M030494_jlr.M030494-1.pdf]

# Supplemental Figure 1

Fwd H/M 64 Apobec-1

45 **gagaagaattgagccccacgagtttgaagtcttctttgacccccgggagcttcggaag** Mu  
| | | | | | | | | | | | | | | | | | | | | | | | | | | | | | | | | |  
gagaagaatcgaaccctgggagtttgacgtcttctatgaccccagagaacttcgtaaag Hu

**agacctgtctgctgtatgagatcaactggggtggaaggcagctgtctggcgacacacg** Mu  
| | | | | | | | | | | | | | | | | | | | | | | | | | | | | | | | | |  
aggcctgtctgctctacgaaatcaagtggggcatgagccggaagatctggcgaagaaga Hu

**agccaaaacaccagcaaccacgttgaagtcaacttcttagaaaaatttactacagaaag** Mu  
| | | | | | | | | | | | | | | | | | | | | | | | | | | | | | | | | |  
tcaggcaaaaacaccaccaatcacgtggaagttaattttataaaaaaatcttacgtcaag Hu

**atactttcgtccgaacaccagatgctccattacctggttcctgtcctggagtcctgctgcg** Mu  
| | | | | | | | | | | | | | | | | | | | | | | | | | | | | | | | | |  
agattttcacccatccatgagctgctccatcacctggttcttgtcctggagtcctgct Hu

Rev H/M 284 Apobec-1

**gggagtgctccagggcattacagagtttctgagccgacaccctatgtaactctgttt** Mu  
| | | | | | | | | | | | | | | | | | | | | | | | | | | | | | | | | |  
gggaatgctcccaggctattagagagtttctgagtcggcaccctggtgtgactctagtg Hu

**atttacatagcacggctttatcaccacacggatcagcgaaacccgccaaggactcagggga** Mu  
| | | | | | | | | | | | | | | | | | | | | | | | | | | | | | | | | |  
atctacgtagctcggcttttttggcacatggatcaacaaaatcggcaagggtctcagggga Hu

**ccttattagcagcgggtgtgactatccagatcatgacagagcaag** 397 Mu  
| | | | | | | | | | | | | | | | | | | | | | | | | | | | | | | | | |  
ccttgtaacagtggagtaactattcagattatgagagcatcag Hu

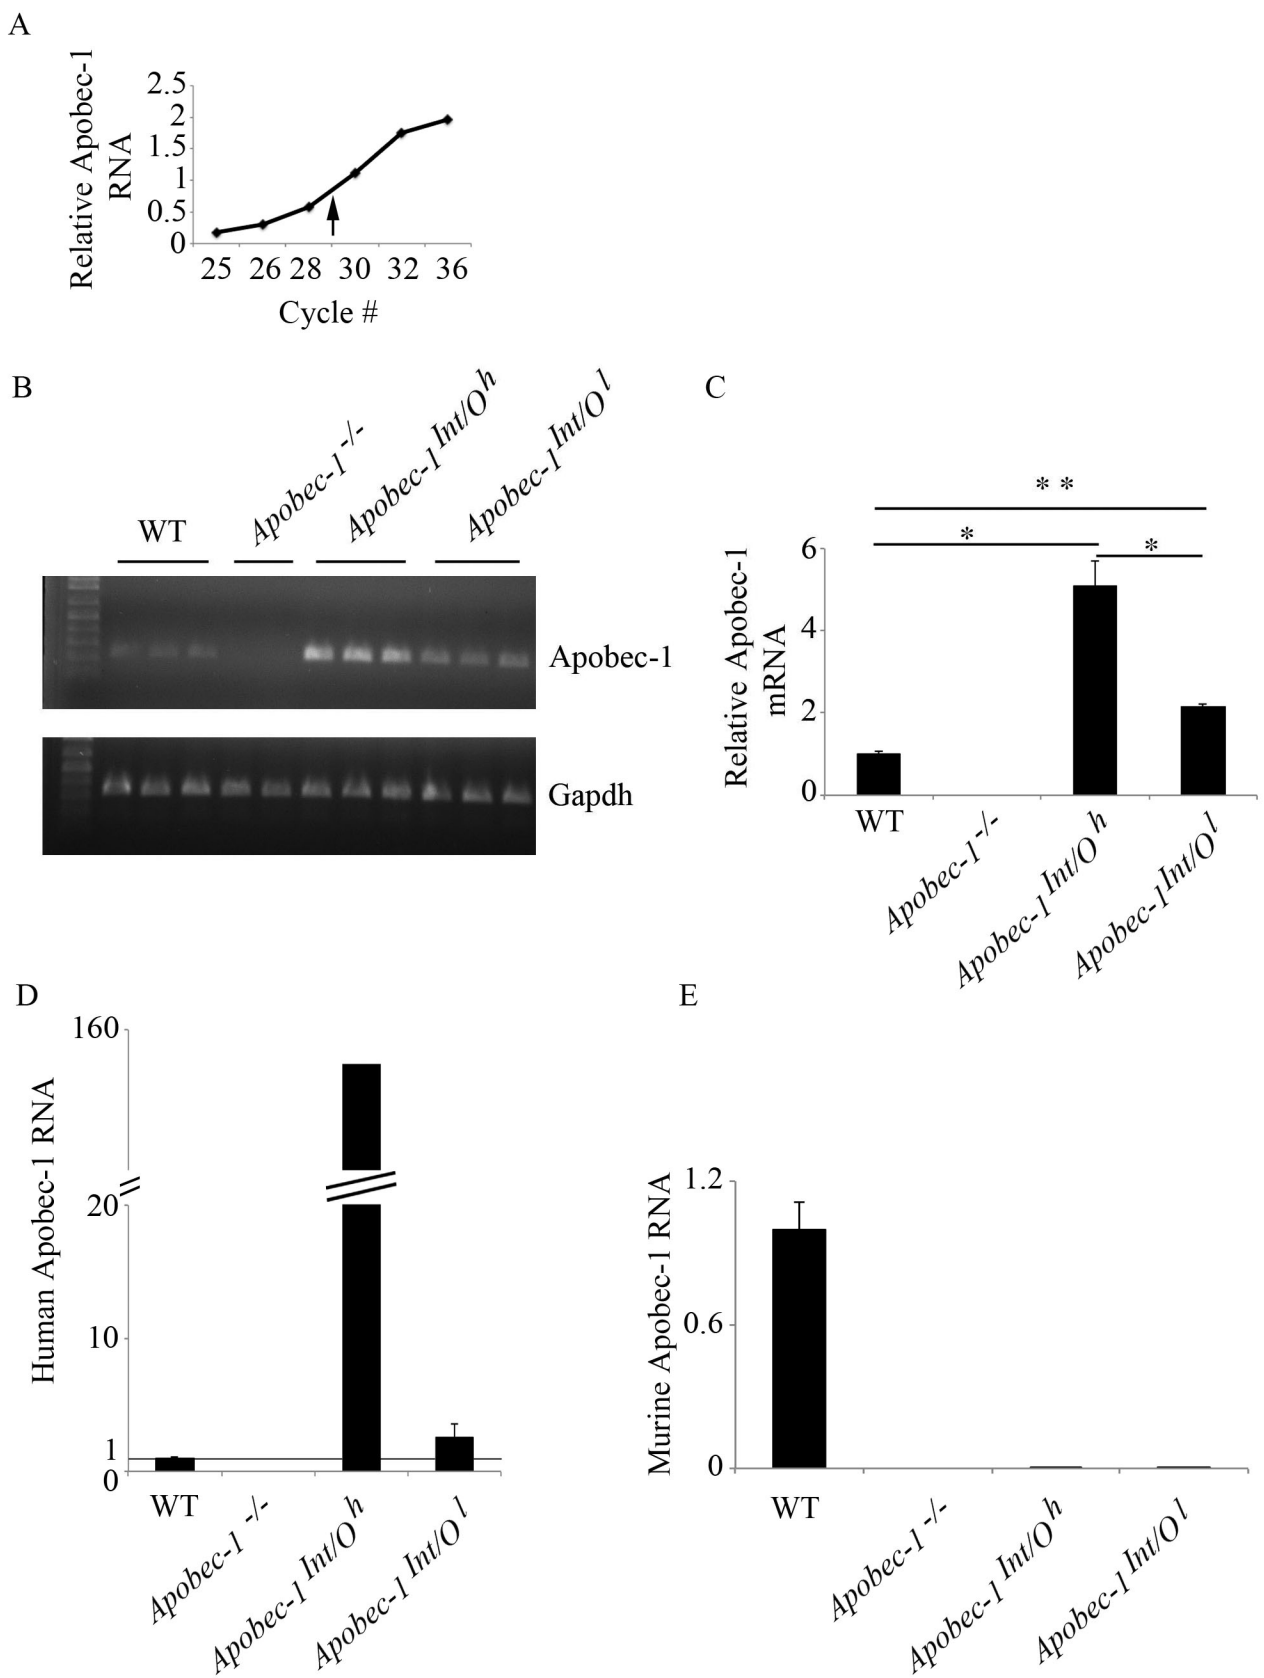

Supplemental Figure 2

**Supplemental Figure 1.** Sequence alignment of murine (Mu) apobec-1 exon6 (bold) with human apobec-1 (Hu). Nucleotides are numbered starting from the ATG. Arrows indicate the position of primers used for the semi-quantitative evaluation of human Apobec-1 RNA expression. Sequences of the primers are given in Methods section.

**Supplemental Figure 2. Determination of transgenic human Apobec-1 RNA expression.** A. RNA was isolated from separate WT animals and used in an RT-PCR reaction with forward and reverse H/M primers (recognizing both murine and human apobec-1 within exon 6) as detailed in Methods. PCR reactions were performed in duplicate at the indicated cycle number (25-36). The number of cycles chosen to analyze Apobec-1 RNA expression was determined from the exponential phase of amplification (arrow) to be at cycle 29. B-C. Total RNA isolated from intestinal mucosa of individual WT, *Apobec-1*<sup>-/-</sup>, *Apobec-1*<sup>Int/0h</sup> and *Apobec-1*<sup>Int/0l</sup> mice was RT-PCR for 29 cycles. Relative RNA expression of human apobec-1 was normalized to Gapdh and calculated as fold expression relative to murine apobec-1 in wild-type animals. Data represent mean ± SE (n=3 animals per genotype). \* P < 0.01; \*\* P < 0.001. D-E. Expression of human and murine Apobec-1 RNA evaluated by quantitative PCR, using species-specific primers (Methods). D. Relative expression of human apobec-1 RNA was determined using human-specific primers. Data represent mean ± SE (n= 3-4 animals per genotype). E. Relative expression of murine apobec-1 RNA using murine-specific primers. Data represent mean ± SE (n=3-4 animals per genotype).
